# Supplementary material for: LAMP2A regulates the loading of proteins into exosomes
Source: bioRxiv or medRxiv preprint supplement (doi:10.1101/2021.07.26.453637), 2021-07-26

# Supplemental Figure 1

**A**

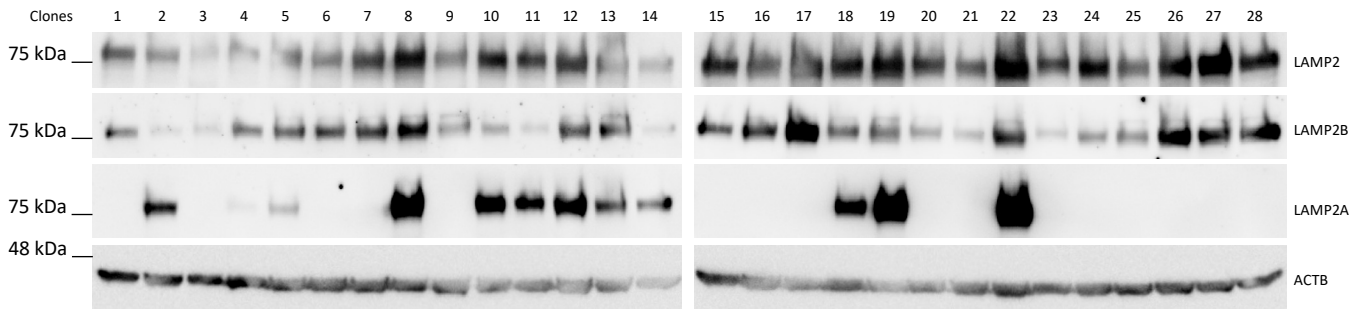

**B**

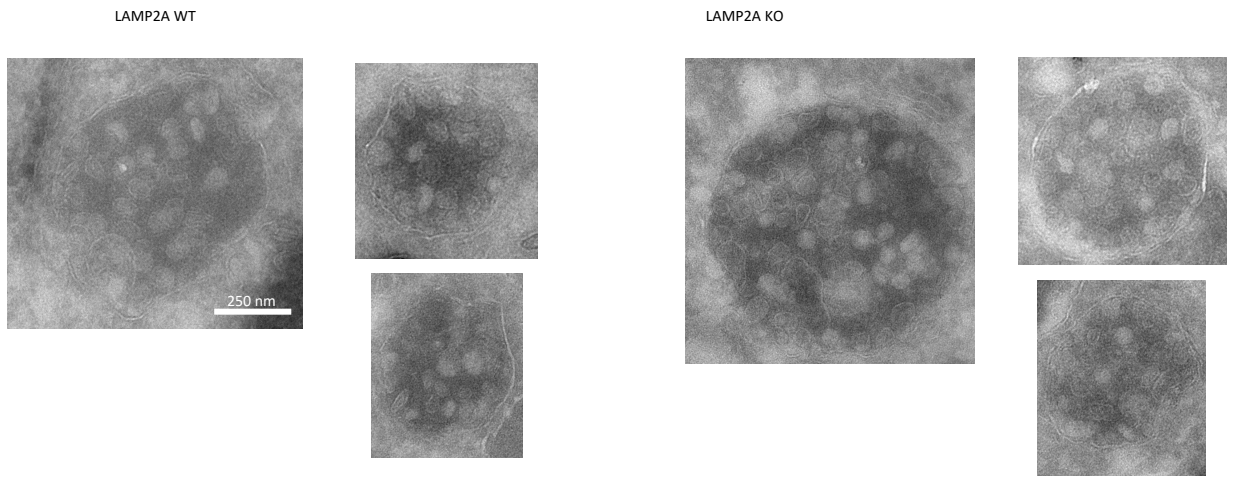

**C**

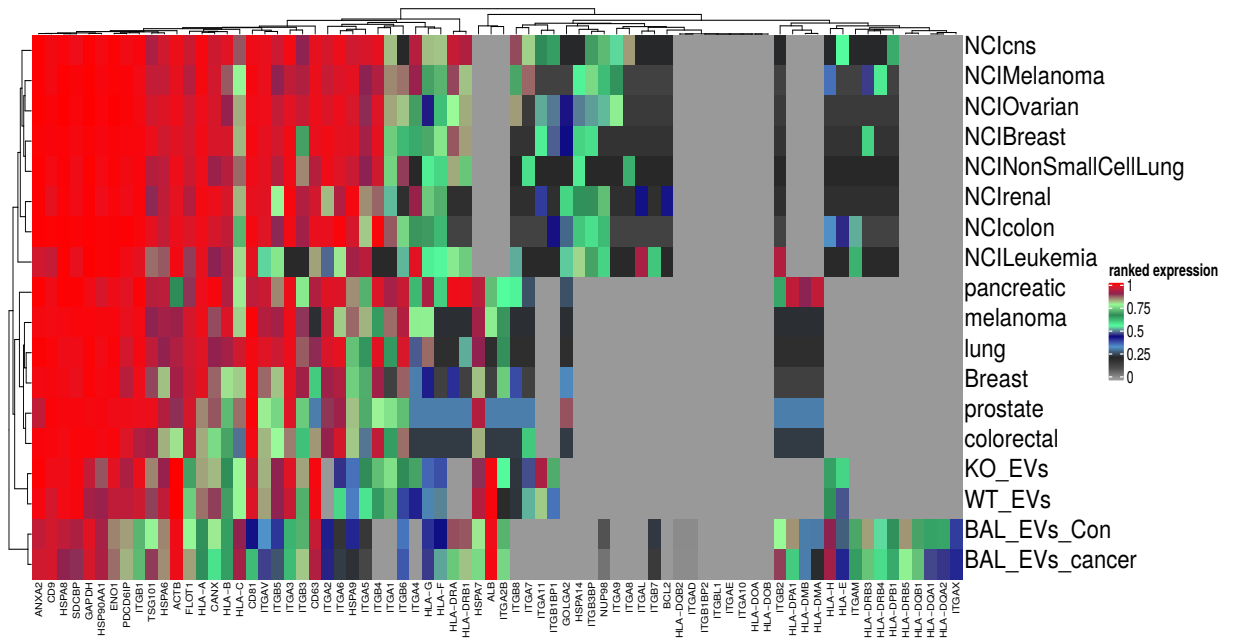

Supplement: Supplementary file [file media-1.pdf]
