# Supplementary material for: LAMP2A regulates the loading of proteins into exosomes
Source: bioRxiv or medRxiv preprint supplement (doi:10.1101/2021.07.26.453637), 2021-07-26

# Supplemental Figure 3

A

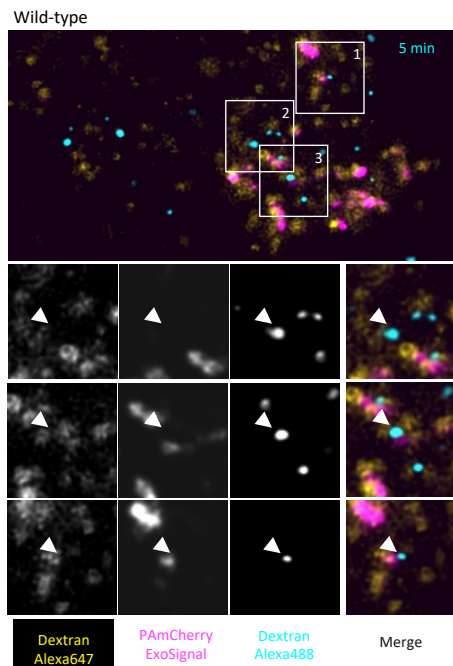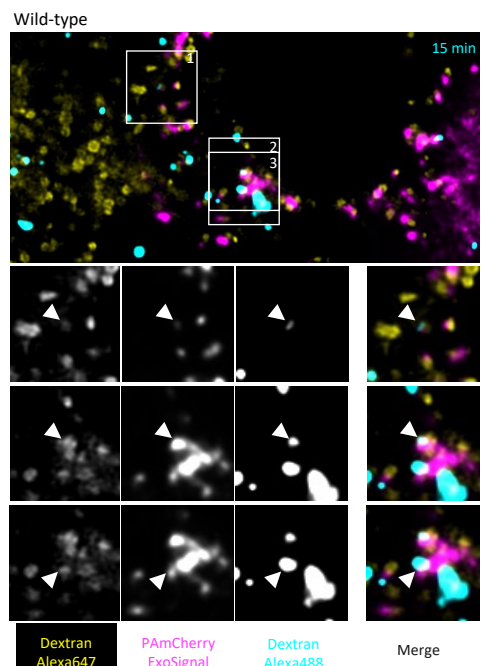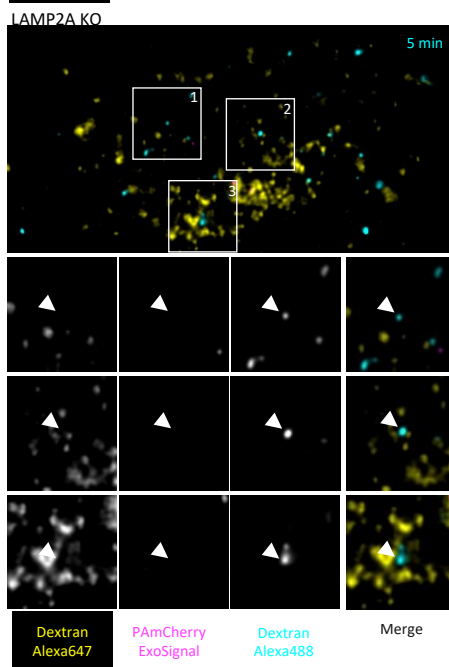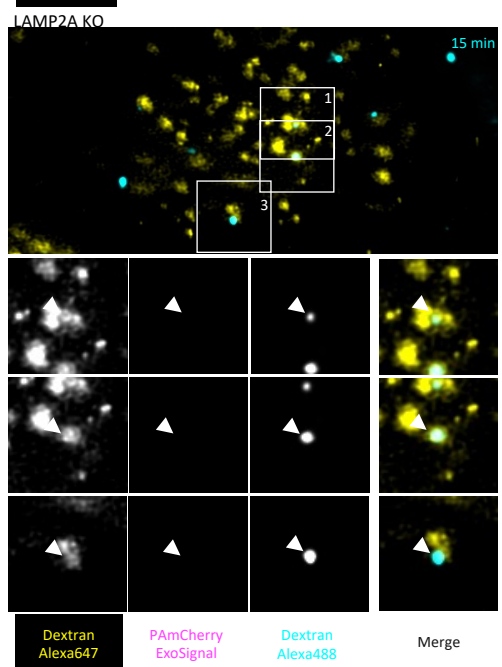

B

LAMP2A KO PAmCherry-ExoSignal + LAMP2A

WT PAmCherry

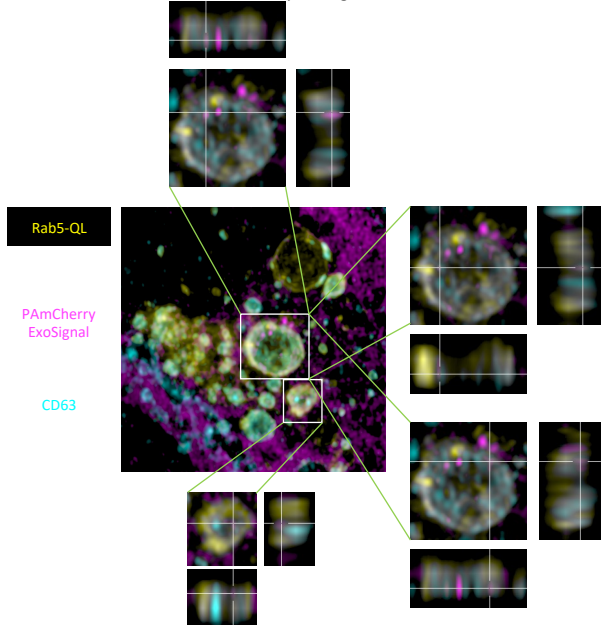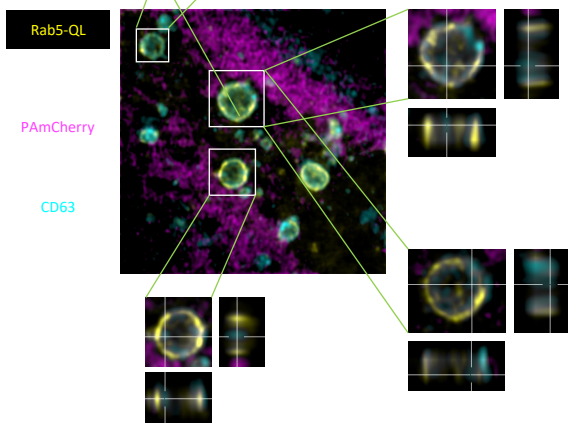

Supplement: Supplementary file [file media-3.pdf]
